# Supplementary material
Source: MDPI journal article supplement (https://www.mdpi.com/2227-9709/8/1/16)
Supplement: s1 [file s1]

Supplementary Table S1: Summary of 61 studies qualified for quantitative descriptive analysis.

| Study                     | Health Application in ICU                                                                                                                                               | Clinical Variables                                                                                                                                                                                                  | ML-Models                                                                           | Dataset Size                                                                                   | ML Model Performance                                                                                                | Imputation | Feature Importance | Validation               |
|---------------------------|-------------------------------------------------------------------------------------------------------------------------------------------------------------------------|---------------------------------------------------------------------------------------------------------------------------------------------------------------------------------------------------------------------|-------------------------------------------------------------------------------------|------------------------------------------------------------------------------------------------|---------------------------------------------------------------------------------------------------------------------|------------|--------------------|--------------------------|
| Lee et al, (2010) [59]    | Early prediction of hypotensive episodes.                                                                                                                               | Age, SBP, DBP, mean arterial blood pressure, heart rate, and medication                                                                                                                                             | ANN                                                                                 | 1,311 ICU records.                                                                             | AUROC ANN: 0.918                                                                                                    | Not clear  | Yes                | 5-fold cross validation. |
| Lee et al, (2011) [60]    | To predict hypotensive episode based on heart rate and blood pressure extracted from time series data                                                                   | Time series data for Health Rate and Arterial Blood Pressure                                                                                                                                                        | Three layer Artificial Neural Network                                               | 130,325 control and 3,953 hypotensive examples                                                 | AUROC ANN: 0.934 (Best Mean)                                                                                        | No         | Yes                | 5-fold cross validation  |
| Mikhno et al, (2012) [71] | Prediction of extubation failure in Neonates with respiratory distress syndrome.                                                                                        | Age, demographic, birth weight, gestational age, BP, LOS, time from birth to intubation and extubation, respiratory rate, heart rate, Monocytes, Fio2, pao2, chart data, labs, and ventilation settings, and values | LOG-R                                                                               | 179 neonates that were intubated within 24 hours of birth.                                     | AUC<br>LOG-R: 0.871                                                                                                 | No         | Yes                | Yes.                     |
| Celi et al, (2012) [21]   | To build customized mortality prediction model on three subsets: patients with acute kidney injury , patients with subarachnoid hemorrhage (SAH) , and elderly patients | For AKI: 118 variables were used<br>For SAH: 53 variables were used<br>For Open-heart surgery: 41 variables were used.<br>Refer to paper for specific details.                                                      | Logistic regression (LR), Bayesian network (BN) and artificial neural network (ANN) | 1400 AKI patients<br>223 individual hospitalizations of subarachnoid hemorrhage (SAH)<br>3,261 | AUROC (Best Performance)<br>ANN: 0.875 for AKI<br>Bayesian Network: 0.958 for subarachnoid hemorrhage<br>ANN: 0.941 | No         | Yes                | 5-fold cross validation  |

|                             |                                                                                           |                                                                                                   |     |                                                             |                                                                                                                                                                                                                        |               |               |                           |
|-----------------------------|-------------------------------------------------------------------------------------------|---------------------------------------------------------------------------------------------------|-----|-------------------------------------------------------------|------------------------------------------------------------------------------------------------------------------------------------------------------------------------------------------------------------------------|---------------|---------------|---------------------------|
|                             | undergoing open heart surgery                                                             |                                                                                                   |     | patients who undergone heart surgery.                       | for open heart surgery                                                                                                                                                                                                 |               |               |                           |
| Behar et al, (2013) [72]    | False alarm detection in cardiology.                                                      | Waveform data                                                                                     | SVM | 4050 life threatening heart rate related arrhythmia alarms. | Overall Sensitivity<br><br>SVM: 0.744<br>Overall Specificity<br>SVM: 0.935                                                                                                                                             | Not mentioned | Not mentioned | 5-fold cross validation.  |
| Marafino et al, (2014) [42] | ML classifier to identifying a range of procedures and diagnoses from ICU clinical notes. | Discharge summaries, nursing notes, radiology reports, and if available, physician progress notes | SVM | 4,191 NICU and 2,198 adult ICU patients.                    | Accuracy for identifying mechanical ventilation<br>SVM: 0.982-0.987<br>Accuracy for identifying phototherapy use SVM: 0.924-0.940<br>Accuracy for identifying Jaundice<br>SVM: 0.865-0.898<br>Accuracy for identifying | Not mentioned | Yes           | 10-fold cross validation. |

|                             |                                           |                                                                                    |                |                      |                                                            |    |     |                           |
|-----------------------------|-------------------------------------------|------------------------------------------------------------------------------------|----------------|----------------------|------------------------------------------------------------|----|-----|---------------------------|
|                             |                                           |                                                                                    |                |                      | ICH SVM:<br>0.927-0.938                                    |    |     |                           |
| Marafino et al, (2015) [22] | Predict mortality from ICU nursing notes. | All nursing notes only dated within 24 h of the first recorded ICU admission time. | SGD classifier | 25,826 ICU patients. | Mortality Prediction Accuracy<br>SGD classifier: 0.85-0.90 | No | Yes | 10-fold cross validation. |

|                                |                                                          |                                                                                                                                                                                                                                                                                                                                                   |                      |                  |                                                                                              |     |     |                           |
|--------------------------------|----------------------------------------------------------|---------------------------------------------------------------------------------------------------------------------------------------------------------------------------------------------------------------------------------------------------------------------------------------------------------------------------------------------------|----------------------|------------------|----------------------------------------------------------------------------------------------|-----|-----|---------------------------|
| Pirracchio et al, (2015) [23]  | Predict ICU mortality.                                   | Age, gender, type of admission, GCS, SBP, heart rate, body TEMP, PaO <sub>2</sub> /FiO <sub>2</sub> , urinary output, serum urea nitrogen concentration, WBC, serum bicarbonate concentration, sodium concentration, potassium concentration, and bilirubin concentration, immunodeficiency syndrome, metastatic cancer, and hematological cancer | Super learner        | 24,508 patients. | AUROC<br>Super learner: 0.85                                                                 | No  | Yes | 10-fold cross validation. |
| Wang et al, (2015) [73]        | Identify false alarms generated by ICU bedside monitors. | 216 relevant features to capture the characteristics of all alarms, from ABP and ECG signals                                                                                                                                                                                                                                                      | SVM,DT,B DT, and KNN | 5,569 alarms.    | AUC (best performer)<br><br>SVM: 90.61%<br>Please refer to paper for full model performances | Yes | Yes | 5-fold cross validation.  |
| Hoogendoorn et al, (2016) [24] | Predict ICU mortality.                                   | Demographics, Medications, categorical measurements, observations, and continuous and ordinal measurements                                                                                                                                                                                                                                        | LOG-R, Cox, and KNN  | 13,923 patients. | AUC LOG-R and Cox (predictive modelling): 0.84 KNN (patient similarity): 0.68                | Yes | Yes | 5-fold cross validation.  |

|                              |                                                                                                                                                                                               |                                                                                                                |                            |                     |                                                                                               |     |     |                          |
|------------------------------|-----------------------------------------------------------------------------------------------------------------------------------------------------------------------------------------------|----------------------------------------------------------------------------------------------------------------|----------------------------|---------------------|-----------------------------------------------------------------------------------------------|-----|-----|--------------------------|
| Huddar et al, (2016) [17]    | Predict complications from clinical notes.                                                                                                                                                    | Demographic, Vitals, Lab Tests, Medication, Procedures, Diagnoses, Nursing Notes, Radiology, and comorbidities | LOG-R, SVM, DT, AB, and RF | About 700 patients. | AUC (with all combined features)<br>LR:0.881<br>SVM:0.582<br>DT:0.619<br>AB:0.831<br>RF:0.848 | Yes | Yes | 5-fold cross validation. |
| Du et al, (2016) [83]        | Predict mortality in ICU.<br>(28 day mortality)                                                                                                                                               | 73 clinical variables, demographics, vitals, severity, comorbidities, lab, and interventions.                  | DBN, SVM, and GB           | 15,647 patients.    | Mortality Prediction Accuracy<br><br>DBN: 86.0<br>SVM: 84.0<br>GB: 85.5                       | No  | Yes | No                       |
| Desautels et al, (2016) [51] | To study and validate a sepsis prediction method, InSight, for the new Sepsis-3 definitions, make predictions using a minimal set of variables from within the electronic health record data. | Age, gender, vital signs, LOS, ICU type, death during hospital, and other clinical variables.                  | Insight                    | 22853 ICU stays     | Insight AUROC of 0.781 at sepsis onset time                                                   | Yes | No  | 4-fold cross-validation  |

|                             |                                                                                          |                                                                                                                                                                                                                                                                  |                                                         |                                          |                                                                                                |               |     |                                              |
|-----------------------------|------------------------------------------------------------------------------------------|------------------------------------------------------------------------------------------------------------------------------------------------------------------------------------------------------------------------------------------------------------------|---------------------------------------------------------|------------------------------------------|------------------------------------------------------------------------------------------------|---------------|-----|----------------------------------------------|
| Awad et al, (2017) [26]     | Early hospital mortality prediction. (In general Mortality, within 6 hours of admission) | Age, Type of admission, Heart Rate, SBP, TEMP, Respiratory Rate, GCS, Arterial Blood Oxygen, Fractional inspired Oxygen, Serum urea nitrogen, serum creatinine, INR, Sodium, Potassium, WBC, Bilirubin, Platelets count, Hematocrit, AIDS, and Metastatic cancer | RF, NB, DT, and PART (Rule based)                       | 11,722 patients.                         | AUROC (with all attributes)<br><br>RF: 0.85± 0.01<br><br>For detailed accuracy refer to paper. | Yes           | Yes | Cross validation and SMOTE.                  |
| Dervishi et al, (2017) [43] | ICU risk assessment and stratification.                                                  | Heart rate, peripheral ASBP, peripheral ADBP, peripheral arterial mean blood pressure, and SpO2                                                                                                                                                                  | A combination of fuzzy c-means clustering (FCM), and RF | 127 ICU patients.                        | AUROC combination of FCM and RF: 93.2                                                          | Yes           | Yes | Yes                                          |
| Paradkar et al, (2017) [61] | Coronary artery disease detection using photo plethysmography.                           | Features extracted by photo plethysmography signal and its second derivative. Analyzing temporal position of systolic and diastolic phases and characteristic points                                                                                             | SVM                                                     | 55, 35 coronary artery disease patients. | Sensitivity SVM: 0.85<br>Specificity SVM: 0.85                                                 | Not mentioned | Yes | Fifty iterations of 5-fold cross validation. |

|                              |                                                                           |                                                                                                                                                                          |                                              |                   |                                                                                                                      |     |     |                                   |
|------------------------------|---------------------------------------------------------------------------|--------------------------------------------------------------------------------------------------------------------------------------------------------------------------|----------------------------------------------|-------------------|----------------------------------------------------------------------------------------------------------------------|-----|-----|-----------------------------------|
| Ghosh et al, (2017) [52]     | Septic shock.                                                             | Three waveforms: mean arterial pressure, heart rate, and respiratory rate                                                                                                | CHMM                                         | 1,310 samples.    | Prediction of septic shock<br>Accuracy CHMM: 83.7-85.3 for four combinations of gap interval and observation windows | No  | No  | Multiple 5-fold cross validation. |
| Kam et al, (2017) [53]       | Early prediction of sepsis.                                               | Age, SBP, pulse pressure, heart rate, body TEMP, respiration rate, WBC, pH and blood oxygen saturation                                                                   | DFN, Insight, and LSTM                       | 5443 episodes     | AUC<br><br>DFN (109 and 209 features): 0.887-0.915<br>Insight: 0.83<br>LSTM: 0.929                                   | Yes | Yes | Yes                               |
| Desautels et al, (2017) [76] | Identifying patients who are likely to suffer unplanned ICU readmission   | Age, vital signs, bilirubin, creatinine, international normalized ratio (INR), lactate, white cell count, platelet count and pH, FiO2 and total Glasgow Coma Score (GCS) | AdaBoost                                     | 2018 ICU episodes | ICU Readmission AUROC (Best Performance)<br><br>Ensemble model: 0.7095                                               | Yes | No  | 10-fold cross-validation          |
| Morid et al, (2017) [66]     | Predict Adverse event in ICU using temporal patterns<br>AKI as case study | Labs, Vital Signs                                                                                                                                                        | Deep Learning and Traditional ML algorithms. | 22542 patients    | AUC (Best performed)<br>Random Forest 0.809                                                                          | Yes | Yes | 20-fold cross validation          |

|                          |                                                                |                                                                                                                                                                                                                                                                                                                                                                                                                                                                                                                                                                                                                                      |     |                 |                                                                             |    |    |                                                      |
|--------------------------|----------------------------------------------------------------|--------------------------------------------------------------------------------------------------------------------------------------------------------------------------------------------------------------------------------------------------------------------------------------------------------------------------------------------------------------------------------------------------------------------------------------------------------------------------------------------------------------------------------------------------------------------------------------------------------------------------------------|-----|-----------------|-----------------------------------------------------------------------------|----|----|------------------------------------------------------|
| Meyer et al, (2018) [27] | Predict complications, bleeding, mortality, and renal failure. | Age, sex, height, weight systolic mean and diastolic arterial pressure, systolic mean and diastolic pulmonary artery pressure, central venous pressure, ventilator FiO2 setting, heart and respiratory frequency, body TEMP, Bicarbonate, glucose, hemoglobin, oxygen saturation, partial pressure of carbon dioxide and oxygen, pH level, potassium, sodium Albumin, bilirubin, urea, creatinine kinase, hemoglobin , hematocrit, international normalized ratio, creatinine, white blood cell count, lactate dehydrogenase, magnesium, partial thromboplastin time, platelets, prothrombin time Bleeding rate, and urine flow rate | RNN | 5,898 patients. | AUC<br>RNN-Bleeding: 0.75<br>RNN-Mortality: 0.81<br>RNN-Renal Failure: 0.91 | No | No | 10-fold cross validation with weight decay of 0.003. |
|--------------------------|----------------------------------------------------------------|--------------------------------------------------------------------------------------------------------------------------------------------------------------------------------------------------------------------------------------------------------------------------------------------------------------------------------------------------------------------------------------------------------------------------------------------------------------------------------------------------------------------------------------------------------------------------------------------------------------------------------------|-----|-----------------|-----------------------------------------------------------------------------|----|----|------------------------------------------------------|



|                                |                                                                                            |                                                                                                                                                                                                                                                                                                                                                                                                                                                                                     |                                                       |                    |                                                                                                     |     |    |                                      |
|--------------------------------|--------------------------------------------------------------------------------------------|-------------------------------------------------------------------------------------------------------------------------------------------------------------------------------------------------------------------------------------------------------------------------------------------------------------------------------------------------------------------------------------------------------------------------------------------------------------------------------------|-------------------------------------------------------|--------------------|-----------------------------------------------------------------------------------------------------|-----|----|--------------------------------------|
| Purushotham et al, (2018) [28] | Benchmarking various ML algorithms by predicting outcomes: mortality, LOS, and ICD9 group. | Three sets of features used. Set A: Total 17 data elements. Age, admission type, TEMP, SBP, Heart rate, Body pao2/fio2 ratio, urine output, serum urea nitrogen level, WBC count, serum bicarbonate level, Sodium level, potassium level, bilirubin level, Glasgow coma scale, AIDS, hematologic malignancy, and metastatic cancer, Set B: elements from Set A plus three additional variables for the GCS, PaO2, and FiO2 Set C: 136 elements that includes 20 elements from set B | Super Learner, FFN, RNN, and Multimodal deep learning | 38,425 admissions. | Exhaustive benchmarking evaluation of models was done, please refer to paper for detailed accuracy. | Yes | No | Multiple rounds of cross validation. |
|--------------------------------|--------------------------------------------------------------------------------------------|-------------------------------------------------------------------------------------------------------------------------------------------------------------------------------------------------------------------------------------------------------------------------------------------------------------------------------------------------------------------------------------------------------------------------------------------------------------------------------------|-------------------------------------------------------|--------------------|-----------------------------------------------------------------------------------------------------|-----|----|--------------------------------------|

|                            |                                                                                 |                                                                                                                                                                                                                                                                                                                                  |                                                                     |                  |                                                                                                                                                                              |     |     |                                            |
|----------------------------|---------------------------------------------------------------------------------|----------------------------------------------------------------------------------------------------------------------------------------------------------------------------------------------------------------------------------------------------------------------------------------------------------------------------------|---------------------------------------------------------------------|------------------|------------------------------------------------------------------------------------------------------------------------------------------------------------------------------|-----|-----|--------------------------------------------|
| Ding et al, (2018) [74]    | ICU patients health status monitoring.                                          | Age, gender and other demographics, waveform data of vital signs: heart rate, mean artery blood pressure, ASBP and ADBP, and respiratory rate, and other parameters                                                                                                                                                              | LWPR-PCA, L-PCA, LWPR-JPCA, LWPR-MPCA, LWPR-PLS, KPCA, PLS, and PCA | 18 patients.     | Mean fault detection rate (95% confidence interval)<br>LWPR-PCA:94.4<br>L-PCA:90.1<br>LWPR-JPCA:94.7<br>LWPR-MPCA:97.6<br>LWPR-PLS:95.2<br>KPCA:25.7<br>PLS:61.7<br>PCA:66.6 | No  | Yes | Stochastic leave-one-out cross validation. |
| Davoodi et al, (2018) [29] | Predict mortality in ICU.<br>(In general Mortality, 48hours from ICU admission) | Age, gender, TEMP, SBP, DBP, albumin, anion gap, Bicarbonate, In-hospital mortality index, bilirubin, BUN, chloride, creatinine, glucose lab test, hematocrit, hemoglobin, INR, lactate, mechanical ventilation, platelet, potassium, PT, PTT, sodium, WBC, glucose, heart rate, mean blood pressure, respiratory rate, and SPO2 | DRBFS, NB, DT,GB, DBN, and D-TSK-FC                                 | 10,972 patients. | AUROC (%)<br><br>NB: 73.51<br>DT: 61.81<br>GB: 72.98<br>DBN: 70.07<br>D-TSK-FC: 66.74<br>DRBFS: 73.90                                                                        | Yes | Yes | Hold out method of validation.             |

|                          |                                                                                     |                                                                                                                                                                                                                                                                                 |                                  |                                            |                                                                                                                      |     |     |                           |
|--------------------------|-------------------------------------------------------------------------------------|---------------------------------------------------------------------------------------------------------------------------------------------------------------------------------------------------------------------------------------------------------------------------------|----------------------------------|--------------------------------------------|----------------------------------------------------------------------------------------------------------------------|-----|-----|---------------------------|
| Li et al, (2018) [86]    | Predicting AKI using clinical notes.                                                | Age, gender, race, ethnicity, clinical notes during the first 24 hours of ICU admission, and 72-hour serum creatinine after admission                                                                                                                                           | SVM, LOG- R, RF, GB, NB, and CNN | 77,160 clinical notes of 14,470 patients.  | AUCRidge LOG-R (best performed) : 0.779Please refer to paper for other models performance                            | No  | No  | 5-fold cross validation.  |
| Anand et al, (2018) [34] | Predict mortality in diabetic patients.                                             | Gender, ethnicity, type of admission, location of admission, insurance, diagnoses, admissions, lab values (HbA1c, blood glucose, and serum creatinine) and medications                                                                                                          | RF and combined LOG-R            | 4,111 patients.                            | AUC<br><br>RF: 0.787<br>Binomial LOG-R: 0.785                                                                        | No  | Yes | 5-fold cross validation.  |
| Zahid et al, (2018) [30] | Mortality prediction. (In hospital mortality and 30 days after discharge)           | Age, gender, type of admission, vitals, labs, ICU service type, primary ICD-9 code, mechanical ventilation or continuous Positive Airway Pressure during the first 24 hours in the ICU, and the receipt of vasopressor therapy during the first 24 hours, GCS, and urine output | SNN                              | 17,150 patient with 29,149 ICU admissions. | AUROC for 30 days mortality SNN: 0.8445 ( $\pm$ 0.08)<br><br>AUROC for in hospital mortality SNN: 0.86 ( $\pm$ 0.12) | No  | No  | 10-fold cross validation. |
| Ren et al, (2018) [75]   | Predict unexpected respiratory decompensation requiring intubation in ICU patients. | Age, gender, heart rate, BP, respiratory rate, Pao2,GCS, PaCo2, pH, hematocrit, hemoglobin, chloride,                                                                                                                                                                           | GB, LOG-R, and FFN               | 12,470 patients.                           | AUROC ( at window sizes 8 and lead time 3)<br>GB: 89%                                                                | Yes | Yes | 10-fold cross validation. |

|                               |                                                                      |                                                                                                                                                                                                         |              |                |                                                                                                                |     |     |                                   |
|-------------------------------|----------------------------------------------------------------------|---------------------------------------------------------------------------------------------------------------------------------------------------------------------------------------------------------|--------------|----------------|----------------------------------------------------------------------------------------------------------------|-----|-----|-----------------------------------|
|                               |                                                                      | calcium, creatinine, bilirubin, platelet, PT, PTT, INR, blood urea nitrogen, WBC, urine output, Presence of congestive failure, presence of pulmonary circulation disorders, Albumin, and Methemoglobin |              |                | LOG-R: 81%<br>FFN: 80%                                                                                         |     |     |                                   |
| McWilliams et al, (2018) [77] | Detecting patients that are ready for discharge from intensive care. | Age, gender, vitals, BMI, LOS, discharge delay, in-hospital mortality, readmission, hours since admission, potassium, sodium and creatinine, PAO2, SPO2, PACO2, and hemoglobin.                         | RF and LOG-R | 7592 patients. | Accuracy in predicting patients that are ready for discharge.<br><br>RF: 0.8387-0.8531<br>LOG-R: 0.8366-0.8494 | Yes | Yes | Multiple-source cross validation. |

|                             |                                                                              |                                                                                                                                                                        |                                                                                  |                       |                                                                                                                                                                                                                                    |     |     |                           |
|-----------------------------|------------------------------------------------------------------------------|------------------------------------------------------------------------------------------------------------------------------------------------------------------------|----------------------------------------------------------------------------------|-----------------------|------------------------------------------------------------------------------------------------------------------------------------------------------------------------------------------------------------------------------------|-----|-----|---------------------------|
| Weissman et al, (2018) [31] | Early prediction of mortality or prolonged ICU stay using unstructured data. | Age, type of admission, vital signs, lab data, clinical notes, and modified Elixhauser score                                                                           | LOG-R ,GBM, RF, and ENR applied with and without unstructured clinical text data | 25,947 admissions.    | AUC (RF and GBM performed the best) GBM on both structured and unstructured data: 0.88-0.90<br>GBM on unstructured only: 0.81-0.84<br>RF on both structured and unstructured data: 0.87-0.89<br>RF on unstructured only: 0.81-0.83 | Yes | Yes | 10-fold cross validation. |
| Rojas et al, (2018) [78]    | Predict ICU readmissions.                                                    | demographics, vital signs, labs, medications administered during the ICU admission, ICU interventions, nursing , diagnostic tests, and ICD codes from prior admissions | GBM, SWIFT, and MEWS                                                             | 42,303 ICU transfers. | AUC (with 95% confidence interval with early, late, and ever time to re-admission)<br><br>GBM: 0.71–0.78<br>SWIFT: 0.60–0.68<br>MEWS: 0.52–0.62                                                                                    | No  | No  | 10-fold cross validation. |
| Chen et al, (2018) [44]     | To develop a personalized diagnostic model                                   | Demographics, comorbidities, vital signs, laboratory data,                                                                                                             | Logistic Regression, C4.5, LogitBoost,                                           | 38,597 adult patients | AUROC logistic regression: 0.86                                                                                                                                                                                                    | Yes | Yes | 5-fold cross-validation   |

|                         |                                                                                                                                                                                                                  |                                                                                                                |                                                                                               |                           |                                                                                                                        |     |     |                          |
|-------------------------|------------------------------------------------------------------------------------------------------------------------------------------------------------------------------------------------------------------|----------------------------------------------------------------------------------------------------------------|-----------------------------------------------------------------------------------------------|---------------------------|------------------------------------------------------------------------------------------------------------------------|-----|-----|--------------------------|
|                         | for kidney stone disease                                                                                                                                                                                         | and other clinical variables                                                                                   | Random Forest, Super Learner                                                                  |                           |                                                                                                                        |     |     |                          |
| Jain et al, (2018) [32] | To Develop a Predictive Model for ICU Mortality in Patients with Acute Exacerbation COPD                                                                                                                         | Demographics, comorbidities, number of readmissions, and social economic status. Refer paper for more details. | univariate GLM-derived logistic, (2) Mean Gini-derived logistic (MGDL), and (3) random forest | 1198 admissions           | AUROC (Best performer) MGDL 0.778 for predicting mortality.                                                            | No  | Yes | 5-fold cross validation  |
| Tang et al, (2018) [33] | To conduct a systematic comparative study of different ML algorithms for several predictive modeling problems in urgent care. (mortality and prediction, differential diagnostics, and disease marker discovery) | Demographics, vital signs, insurance, comorbidities, and labs                                                  | Deep Learning and Traditional ML algorithms.                                                  | 37787 patients            | For detailed accuracy by problem refer to paper                                                                        | Yes | Yes | 5-fold cross validation  |
| Lin et al, (2019) [35]  | Predict in hospital mortality for AKI patients.                                                                                                                                                                  | Age, type of admission, AIDS, metastatic cancer, hematologic malignancy, and 12 physiological variables.       | RF, ANN, SVM, and customized SAPS II                                                          | 19,044 patients with AKI. | AUROC<br>RF: 0.866 (0.862–0.870)<br>SVM: 0.861 (0.855–0.868)<br>ANN: 0.833 (0.818–0.848)<br>SAPSII 0.795 (0.781–0.809) | Yes | Yes | 5-fold cross validation. |

|                             |                                             |                                                                                                                                                                                                                                                                                                                                                |                            |                  |                                                     |     |     |                                             |
|-----------------------------|---------------------------------------------|------------------------------------------------------------------------------------------------------------------------------------------------------------------------------------------------------------------------------------------------------------------------------------------------------------------------------------------------|----------------------------|------------------|-----------------------------------------------------|-----|-----|---------------------------------------------|
| Liu et al,<br>(2019) [54]   | Septic shock prediction in sepsis patients. | Heart rate, respiratory rate, TEMP, SBP, DBP, mean, BP, CVP, PaO2, FiO2, GCS, bilirubin, platelets, creatinine, lactate, BUN, arterial, pH, WBC, PaCO2, hemoglobin, hematocrit, potassium, epinephrine, dopamine, dobutamine, norepinephrine, phenylephrine, vasopressin, and urine output.                                                    | GLM, XGBoost, RNN, and Cox | 38,418 patients. | AUC GLM: 0.87 XGBoost: 0.85 RNN: 0.93 Cox: 0.82     | No  | Yes | 10-fold cross validation.                   |
| Zhang et al,<br>(2019) [67] | Predict AKI in patients with Oliguric.      | Age, gender, ethnicity, type of admission, heart rate, BP, respiratory rate, TEMP, elective surgery, ICU type, vasopressor, infection, mechanical ventilation, serum creatinine, glucose, bicarbonate, bilirubin, chloride, hematocrit, lactate, platelet, potassium, aPTT, INR, Sodium, BUN, WBC, albumin, urinary pH, and Urinary creatinine | LOG-R and XGBoost          | 6,682 patients.  | AUC<br><br>XGBoost: 0.842-0.878<br>LOG-R: 0.703-753 | Yes | Yes | Cross validation done using 300 iterations. |

|                              |                                                                                                                                    |                                                                                                                                                                                                             |                                                                                             |                                        |                                                                                           |     |     |                                                       |
|------------------------------|------------------------------------------------------------------------------------------------------------------------------------|-------------------------------------------------------------------------------------------------------------------------------------------------------------------------------------------------------------|---------------------------------------------------------------------------------------------|----------------------------------------|-------------------------------------------------------------------------------------------|-----|-----|-------------------------------------------------------|
| Zimmerman et al, (2019) [68] | Predict AKI after day 1 of ICU admission.                                                                                          | Age, Gender, Ethnicity, Creatinine, Heart Rate, BP(SBP and DBP), TEMP, SpO2, Glucose, Bicarbonate, Hemoglobin, Platelet count, Potassium, Partial Thromboplastin, INR, Prothrombin                          | Multivariate LOG-R, RF, and MLP                                                             | 23,950 patients.                       | AUC<br><br>LOG-R: 0.783 with all-features.                                                | Yes | Yes | 5-fold cross validation, 10 runs of cross validation. |
| Kaji et al, (2019) [62]      | To predict clinical events, myocardial infarction (MI), and vancomycin antibiotic administration over two week patient ICU courses | MI model contained 221 features, the sepsis model contained 225 features, and the vancomycin model contained 224 features that includes demographics, vital signs, lab results and other clinical variables | LSTM                                                                                        | 56,841 patients                        | AUC of 0.876 for sepsis, 0.823 for MI, and 0.833 for vancomycin administration using LSTM | Yes | Yes | No                                                    |
| Barrett et al, (2019) [63]   | To predict one-year mortality in patients diagnosed with acute myocardial infarction or post myocardial infarction syndrome        | Demographics, Admissions, Diagnostic Information, Labs                                                                                                                                                      | Deep FNN and multiple traditional ML algorithm including Logistic regression, Random forest | 5436 admissions                        | AUC of 2 Best performed models. Logistic Model Tree and Simple Logistic: 0.901            | No  | Yes | 10-fold cross validation                              |
| Lin et al, (2019) [79]       | To predict the ICU readmission of patients within 30                                                                               | Demographics, vital signs, comorbidities, and GCS.                                                                                                                                                          | Recurrent Neural Networks (RNN)                                                             | 35,334 patients with 48,393 ICU stays. | AUROC LSTM: 0.791                                                                         | Yes | Yes | 5-fold cross validation                               |



|                                   |                                                                                                                         |                                                                                                                       |                                             |                                                            |                                                                                              |     |     |                                    |
|-----------------------------------|-------------------------------------------------------------------------------------------------------------------------|-----------------------------------------------------------------------------------------------------------------------|---------------------------------------------|------------------------------------------------------------|----------------------------------------------------------------------------------------------|-----|-----|------------------------------------|
|                                   | days of their discharge                                                                                                 |                                                                                                                       | with Long Short-Term Memory (LSTM)          |                                                            |                                                                                              |     |     |                                    |
| Caicedo-Torres et al, (2019) [36] | A multi-scale deep convolutional architecture to predict ICU mortality                                                  | 22 features including demographics, Labs, Vitals, comorbidities                                                       |                                             | 22,413 distinct patients                                   | AUROC CovNet: 0.8735                                                                         | Yes | Yes | 5-fold cross validation            |
| Payrovnaziri et al, (2019) [64]   | To predict one-year mortality in ICU patients with Acute Myocardial Infarction(AMI) and Post Myocardial Infarction(PMI) | Demographics, Labs, Vital Signs, comorbidities, admissions, discharge summary                                         | Deep Learning                               | 5,436 admissions                                           | Deep learning model achieved 82.02% accuracy                                                 | No  | Yes | 10-fold cross validation           |
| Sun et al, (2019) [69]            | To identify early AKI onset Using Clinical Notes and Structured Multivariate Physiological Measurements                 | Demographics, Labs, Vital Signs, comorbidities, Ventilations, ICU clinical notes for first 24 hours of ICU admissions | CNN and traditional ML models including SVM | A total of 16,558 ICU stays of 14,469 patients             | AUC above 0.83 with SVM best performer                                                       | Yes | Yes | 5-fold cross validation            |
| Scherpf et al, (2019) [55]        | Predicting sepsis onset with a recurrent neural network                                                                 | Demographics, vital signs, and labs.                                                                                  | RNN and Insight                             | Patients selected based on exclusion from previous studies | Prediction 3 h prior to sepsis onset, network achieves an AUROC of 0.81                      | Yes | Yes | 4-fold-stratified-cross-validation |
| Cramer et al, (2019) [45]         | prognostic tools for determining a patient's risk of hospital-acquired pressure ulcers (PUs) in intensive care units    | Demographic parameters, diagnosis codes, laboratory values and vitals available                                       | Multiple Traditional ML and DL models       | 50,851 admissions                                          | A weighted linear regression model showed precision 0.09 and recall 0.71 for future pressure | Yes | Yes | 5-fold cross validation            |

|                                 |                                                                                             |                                                                                         |                                                                                                           |                                            |                                          |     |     |                          |
|---------------------------------|---------------------------------------------------------------------------------------------|-----------------------------------------------------------------------------------------|-----------------------------------------------------------------------------------------------------------|--------------------------------------------|------------------------------------------|-----|-----|--------------------------|
|                                 |                                                                                             |                                                                                         |                                                                                                           |                                            | ulcers development                       |     |     |                          |
| Fagerström et al, (2019) [56]   | Develop an improved algorithm for early detection of septic shock                           | Demographics, Vital signs, and labs, GCS, diagnosis.                                    | LiSep LSTM                                                                                                | 59,000 ICU patients                        | AUROC LSTM: 0.8306                       | Yes | Yes | 6-fold cross validation  |
| Xia et al, (2019) [46]          | Build an Ensemble Approach for Improving the Outcome Prediction in Intensive Care Unit      | Demographics, vital signs, and labs                                                     | eLSTM                                                                                                     | 18415 cases                                | AUROC Ensemble LSTM: 0.8451              | Yes | Yes | No                       |
| Garcia-Gallo et al, (2020) [37] | Develop a model for predicting 1-year mortality in critical patients diagnosed with sepsis. | Demographics, comorbidities, vital signs, laboratory data, and other clinical variables | Stochastic gradient boosting (SGB)                                                                        | 5,650 admissions                           | AUROC SGB: 0.8039                        | Yes | Yes | No                       |
| Rongali et al, (2020) [47]      | Learning Latent Space Representations to Predict Patient Outcomes                           | Demographics, Labs, Diagnosis, Medications                                              | long short-term memory (LSTM) outcome prediction using comprehensive feature relations or in short, CLOUT | 7,537 patients                             | AUROC (Best performed) CLOUT Model: 0.89 | No  | Yes | No                       |
| Cherifa et al, (2020) [65]      | Prediction of an Acute Hypotensive Episode During an ICU Hospitalization                    | Demographics, Medications, Vital signs, cause of admission                              | Super Learner                                                                                             | 1,151 MIMIC patients<br>55 external cohort | AUROC (Best) Super Learner: 0.929        | No  | Yes | 10-fold cross validation |

|                         |                                                                                                                                             |                                                                                         |                                                  |                                                                                                                      |                                                                                                                                 |     |           |                          |
|-------------------------|---------------------------------------------------------------------------------------------------------------------------------------------|-----------------------------------------------------------------------------------------|--------------------------------------------------|----------------------------------------------------------------------------------------------------------------------|---------------------------------------------------------------------------------------------------------------------------------|-----|-----------|--------------------------|
| Lee et al, (2020) [48]  | Develop risk prediction models using the gradient boosted tree method to derive risk estimates for acute onset diseases in the near future. | Demographics, time-series clinical observations, labs, medications, diagnosis.          | Decision tree based models.                      | 21,981 MIMIC hospital admissions<br><br>14,506 University of Washington Clinical Data Repository hospital admissions | Refer paper for detailed accuracy                                                                                               | Yes | Not clear | No                       |
| Su et al, (2020) [49]   | To predict the effects of heparin treatment using machine learning methods                                                                  | Demographics, labs, and medication                                                      | Shallow Neural Network and Traditional ML models | MIMIC 2789 patients<br>eICU 575 patients                                                                             | Best F1 score by shallow neural network of 87.26%                                                                               | Yes | Yes       | 5-fold cross validation  |
| Sha et al, (2020) [38]  | To develop a gated recurrent unit-based recurrent neural network with hierarchical attention for mortality prediction                       | Diagnosis, comorbidities, admissions, demographics, vital signs and labs                | Traditional ML and DL methods                    | 7,537 patients who had at least two hospital admissions in MIMIC-III                                                 | AUROC best performer GRNN 0.8650±0.01                                                                                           | No  | Yes       | 4-fold cross validation  |
| Song et al, (2020) [57] | Early Detection of Late-Onset Neonatal Sepsis using ML                                                                                      | Demographics, vital sign data, blood gas estimations, blood cell counts, and pH levels. | Traditional ML and DL methods                    | 7,870 patients                                                                                                       | Best AUROC of the 48-hour prediction model was 0.861 with Logistic Regression and onset detection model was 0.868 with Gradient | Yes | Yes       | 10-fold cross validation |

|                               |                                                                                                                           |                                                                                                      |                                    |                                                |                                                                           |     |           |                          |
|-------------------------------|---------------------------------------------------------------------------------------------------------------------------|------------------------------------------------------------------------------------------------------|------------------------------------|------------------------------------------------|---------------------------------------------------------------------------|-----|-----------|--------------------------|
|                               |                                                                                                                           |                                                                                                      |                                    |                                                | Boosting Classifier.                                                      |     |           |                          |
| Ahmed et al, (2020) [39]      | Develop a machine learning-based model to predict mortality in trauma patients admitted to ICU                            | Demographics, admissions, LOS, Labs, diagnosis, SOFA score                                           | Traditional ML and DL methods      | 3,041 trauma patients                          | Best performed AUROC of Deep-FLAIM Model: 0.912                           | No  | No        | No                       |
| Eickelberg et al, (2020) [50] | To develop a novel framework to identify ICU patients with a low risk of BI as candidates for earlier EAT discontinuation | Demographics, comorbidities, diagnosis, Labs, medication, and vital signs                            | Traditional ML and DL methods      | 12,232 ICU encounters (10,290 unique patients) | Best models identified patients at low risk of BI with AUROCs up to 0.8   | Yes | Yes       | 10-fold cross validation |
| Yao et al, (2020) [58]        | To develop ML model to predict sepsis post-surgical procedures.                                                           | Demographics, Comorbidities, Labs, Vital Signs, SOFA scores                                          | XGBoost and Linear Regression      | 3,713 patients                                 | Best model XGBoost c-statistics 0.835                                     | Yes | Yes       | 4-fold cross validation  |
| Wang et al, (2020) [70]       | predict acute kidney injury by ensemble learning and time series model                                                    | Labs, Medication, Vital Signs                                                                        | Ensemble Time Series Model (ETSM). | ICUC patients 13053 and MIMIC patients 52152   | Refer paper for detailed performances.                                    | Yes | Yes       | Yes                      |
| Kong et al, (2020) [40]       | to predict in-hospital mortality of sepsis patients in the ICU                                                            | Demographics, vital signs, laboratory tests and comorbidities                                        | Traditional ML models              | 16,688 sepsis patients                         | AUROC Best performed GBM model: 0.845                                     | Yes | Not clear | Not Clear                |
| Zhang et al, (2020) [41]      | Predict hospital mortality, readmissions and LOS using both structured and unstructured data                              | Demographics, vital signs, lab test results, medications, diagnosis codes, as well as clinical notes | Fusion-CNN and Fusion-LSTM         | 39,429 unique admissions                       | For Mortality Prediction : Fusion LSTM - AUROC 0.871 For LOS: Fusion CNN: | Yes | Not clear | Not Clear                |

|  |  |  |  |  |                                                                           |  |  |  |
|--|--|--|--|--|---------------------------------------------------------------------------|--|--|--|
|  |  |  |  |  | AUROC 0.784<br>For 30-day<br>readmissions:<br>Fusion LSTM-<br>AUROC 0.674 |  |  |  |
|--|--|--|--|--|---------------------------------------------------------------------------|--|--|--|

List of Abbreviation used in Multimedia Appendix 1

| Abbreviation | Description                                            |
|--------------|--------------------------------------------------------|
| AB           | AdaBoost                                               |
| ADBP         | Arterial Diastolic Blood Pressure                      |
| AIDS         | Acquired Immuno Deficiency Syndrome                    |
| AKI          | Acute Kidney Injury                                    |
| ANN          | Artificial Neural Networks                             |
| aPTT         | activated Partial Thromboplastin Time                  |
| ASBP         | Arterial Systolic Blood Pressure                       |
| AUC          | Area Under the Curve                                   |
| AUROC        | Area Under the Receiver Operating Characteristic curve |
| BDT          | Bagged Decision Tree                                   |
| BI           | Bacterial infections                                   |
| BMI          | Body Mass Index                                        |
| BP           | Blood Pressure                                         |
| BUN          | Blood Urea Nitrogen                                    |
| CHMM         | Coupled Hidden Markov Models                           |
| CNN          | Convolutional Neural Network                           |
| CVP          | Central Venous Pressure                                |
| DBN          | Deep Belief Networks                                   |
| DBP          | Diastolic Blood Pressure                               |
| DFN          | Deep Feedforward Network                               |
| DRBFS        | Deep Rule-Based Fuzzy System                           |
| DT           | Decision Trees                                         |

|           |                                                                                |
|-----------|--------------------------------------------------------------------------------|
| D-TSK-FC  | deep Takagi-Sugeno-Kang (TSK) fuzzy classifier                                 |
| EAT       | Empiric Antibiotic Therapy                                                     |
| ECG       | Electrocardiogram                                                              |
| eGFR      | Estimated Glomerular Filtration Rate                                           |
| ENR       | Elastic Net Regression                                                         |
| FCM       | Fuzzy c-means Clustering                                                       |
| FFN       | Feedforward Neural Networks                                                    |
| GB        | Gradient Boosting                                                              |
| GBM       | Gradient Boosting Machines                                                     |
| GCS       | Glasgow Coma Score                                                             |
| GLM       | Generalized Linear Models                                                      |
| ICD       | International Classification of Diseases                                       |
| ICD9      | International Classification of Diseases-9                                     |
| ICH       | Intracranial Hemorrhage                                                        |
| ICU       | Intensive Care Units                                                           |
| ICUC      | ICU data in China                                                              |
| INR       | International Normalized Ratio                                                 |
| KNN       | K Nearest Neighbor                                                             |
| KPCA      | Kernel Principal Component Analysis                                            |
| LOG-R     | Logistic Regression                                                            |
| LOS       | Length Of Stay                                                                 |
| L-PCA     | Learning-type Principal Component Analysis                                     |
| LSTM      | Long Short-Term Memory                                                         |
| LWPR-JPCA | Locally Weighted Projection Regression - Joint Principal Component Analysis    |
| LWPR-MPCA | Locally Weighted Projection Regression - Modified Principal Component Analysis |
| LWPR-PCA  | Locally Weighted Projection Regression - Principal Component Analysis          |
| LWPR-PLS  | Locally Weighted Projection Regression - Partial Least Squares                 |
| MEWS      | Modified Early Warning Score                                                   |
| MLP       | Multi Layer Perceptron                                                         |
| NB        | Naïve Bayes                                                                    |

|         |                                           |
|---------|-------------------------------------------|
| NICU    | Neonatal Intensive Care Unit              |
| PART    | Projective Adaptive Resonance Theory      |
| PCA     | Principal Component Analysis              |
| PLS     | Partial Least Squares                     |
| PT      | Prothrombin Time                          |
| PTT     | Partial Thromboplastin Time               |
| RF      | Random Forest                             |
| RNN     | Recurrent Neural Network                  |
| SAH     | Subarachnoid hemorrhage                   |
| SAPS II | Simplified Acute Physiology Score II      |
| SBP     | Systolic Blood Pressure                   |
| SGD     | Stochastic Gradient Descent               |
| SMOTE   | Synthetic Minority Oversampling Technique |
| SNN     | Self normalizing Neural Network           |
| SVM     | Support Vector Machine                    |
| SWIFT   | Stability and Workload Index for Transfer |
| TEMP    | Temperature                               |
| WBC     | White Blood Cell                          |
